# Supplementary material
Source: MDPI journal article supplement (https://www.mdpi.com/2072-4292/14/23/6076)
Supplement: s1 [file s1]

## Correlation coefficients among the variables by watersheds

We performed correlation analysis among all (eight) the variables collected, and we selected the variables that are not collinear but important for the predictions of streamflow in the study area.

The greener cells of the tables indicate the higher correlation between the variables.

Table S1. Alamosa sub basins, correlation coefficient among all the variables

[illegible]

Table S2. Chama below Elv Dam, correlation coefficient among all the variables

| Variables             | Sublimation | Soil Moisture | Albedo | Snow Cover | Snow Depth | SWE    | Precipitation | Avg. Temperature (deg C) |
|-----------------------|-------------|---------------|--------|------------|------------|--------|---------------|--------------------------|
| Streamflow (ac-ft.)   | 0.000       | 0.198         | -0.082 | -0.081     | 0.093      | 0.093  | -0.093        | 0.112                    |
| Sublimation (J/kg)    |             | -0.413        | -0.402 | -0.392     | -0.467     | -0.467 | -0.237        | 0.309                    |
| Soil Moisture (kg/m3) |             |               | 0.765  | 0.757      | 0.792      | 0.792  | 0.363         | -0.642                   |
| Snow Albedo (%)       |             |               |        | 0.997      | 0.841      | 0.841  | 0.302         | -0.772                   |
| Snow Cover            |             |               |        |            | 0.840      | 0.840  | 0.302         | -0.754                   |
| Snow Depth (m)        |             |               |        |            |            | 1.000  | 0.262         | -0.517                   |
| SWE (kg/m2)           |             |               |        |            |            |        | 0.262         | -0.517                   |
| Precipitation (mm)    |             |               |        |            |            |        |               | -0.185                   |

Table S3. Conejos sub basins, correlation coefficient among all the variables

[illegible]



Table S7. Embudo sub basins, correlation coefficient among all the variables

| Variables             | Sublimation | Soil Moisture | Albedo | Snow Cover | Snow Depth | SWE    | Precipitation | Avg. Temperature (deg C) |
|-----------------------|-------------|---------------|--------|------------|------------|--------|---------------|--------------------------|
| Streamflow (ac-ft.)   | 0.068       | 0.062         | -0.166 | -0.164     | -0.085     | -0.085 | 0.052         | 0.186                    |
| Sublimation (J/kg)    |             | -0.326        | -0.313 | -0.297     | -0.351     | -0.352 | -0.152        | 0.326                    |
| Soil Moisture (kg/m3) |             |               | 0.601  | 0.597      | 0.673      | 0.673  | 0.272         | -0.527                   |
| Snow Albedo (%)       |             |               |        | 0.997      | 0.906      | 0.906  | 0.075         | -0.682                   |
| Snow Cover            |             |               |        |            | 0.908      | 0.908  | 0.080         | -0.665                   |
| Snow Depth (m)        |             |               |        |            |            | 1.000  | 0.091         | -0.531                   |
| SWE (kg/m2)           |             |               |        |            |            |        | 0.091         | -0.531                   |
| Precipitation (mm)    |             |               |        |            |            |        |               | 0.066                    |

Table S8. Hondo sub basins, correlation coefficient among all the variables

| Variables             | Sublimation | Soil Moisture | Albedo | Snow Cover | Snow Depth | SWE    | Precipitation | Avg. Temperature (deg C) |
|-----------------------|-------------|---------------|--------|------------|------------|--------|---------------|--------------------------|
| Streamflow (ac-ft.)   | 0.141       | 0.009         | -0.317 | -0.318     | -0.202     | -0.202 | -0.088        | 0.430                    |
| Sublimation (J/kg)    |             | -0.336        | -0.434 | -0.435     | -0.408     | -0.408 | -0.157        | 0.336                    |
| Soil Moisture (kg/m3) |             |               | 0.467  | 0.481      | 0.532      | 0.532  | 0.242         | -0.381                   |
| Snow Albedo (%)       |             |               |        | 0.999      | 0.910      | 0.910  | 0.099         | -0.756                   |
| Snow Cover            |             |               |        |            | 0.908      | 0.908  | 0.101         | -0.762                   |
| Snow Depth (m)        |             |               |        |            |            | 1.000  | 0.124         | -0.545                   |
| SWE (kg/m2)           |             |               |        |            |            |        | 0.124         | -0.544                   |
| Precipitation (mm)    |             |               |        |            |            |        |               | 0.025                    |

Table S9. Lajara sub basins, correlation coefficient among all the variables

| Variables             | Sublimation | Soil Moisture | Albedo | Snow Cover | Snow Depth | SWE    | Precipitation | Avg. Temperature (deg C) |
|-----------------------|-------------|---------------|--------|------------|------------|--------|---------------|--------------------------|
| Streamflow (ac-ft.)   | 0.012       | 0.290         | -0.130 | -0.133     | -0.020     | -0.020 | -0.084        | 0.147                    |
| Sublimation (J/kg)    |             | -0.334        | -0.324 | -0.314     | -0.356     | -0.356 | -0.276        | 0.280                    |
| Soil Moisture (kg/m3) |             |               | 0.627  | 0.621      | 0.646      | 0.646  | 0.320         | -0.511                   |
| Snow Albedo (%)       |             |               |        | 0.999      | 0.860      | 0.860  | 0.312         | -0.799                   |
| Snow Cover            |             |               |        |            | 0.856      | 0.856  | 0.310         | -0.792                   |
| Snow Depth (m)        |             |               |        |            |            | 1.000  | 0.284         | -0.538                   |
| SWE (kg/m2)           |             |               |        |            |            |        | 0.284         | -0.538                   |
| Precipitation (mm)    |             |               |        |            |            |        |               | -0.228                   |

Table S10. Los Pinos sub basins, correlation coefficient among all the variables

| Variables             | Sublimation | Soil Moisture | Albedo | Snow Cover | Snow Depth | SWE    | Precipitation | Avg. Temperature (deg C) |
|-----------------------|-------------|---------------|--------|------------|------------|--------|---------------|--------------------------|
| Streamflow (ac-ft.)   | 0.046       | 0.227         | -0.163 | -0.162     | -0.057     | -0.057 | -0.217        | 0.209                    |
| Sublimation (J/kg)    |             | -0.398        | -0.384 | -0.380     | -0.431     | -0.431 | -0.315        | 0.268                    |
| Soil Moisture (kg/m3) |             |               | 0.671  | 0.676      | 0.664      | 0.664  | 0.341         | -0.508                   |
| Snow Albedo (%)       |             |               |        | 0.999      | 0.862      | 0.862  | 0.438         | -0.793                   |
| Snow Cover            |             |               |        |            | 0.857      | 0.857  | 0.437         | -0.794                   |

|                    |  |  |  |  |  |       |       |        |
|--------------------|--|--|--|--|--|-------|-------|--------|
| Snow Depth (m)     |  |  |  |  |  | 1.000 | 0.381 | -0.519 |
| SWE (kg/m2)        |  |  |  |  |  |       | 0.381 | -0.519 |
| Precipitation (mm) |  |  |  |  |  |       |       | -0.353 |

Table S11. Lucero sub basins, correlation coefficient among all the variables

| Variables             | Sublimation | Soil Moisture | Albedo | Snow Cover | Snow Depth | SWE    | Precipitation | Avg. Temperature (deg C) |
|-----------------------|-------------|---------------|--------|------------|------------|--------|---------------|--------------------------|
| Streamflow (ac-ft.)   | 0.134       | 0.066         | -0.307 | -0.307     | -0.190     | -0.190 | -0.111        | 0.432                    |
| Sublimation (J/kg)    |             | -0.308        | -0.450 | -0.450     | -0.413     | -0.414 | -0.198        | 0.346                    |
| Soil Moisture (kg/m3) |             |               | 0.409  | 0.424      | 0.465      | 0.465  | 0.226         | -0.337                   |
| Snow Albedo (%)       |             |               |        | 0.999      | 0.914      | 0.914  | 0.153         | -0.747                   |
| Snow Cover            |             |               |        |            | 0.912      | 0.912  | 0.154         | -0.754                   |
| Snow Depth (m)        |             |               |        |            |            | 1.000  | 0.149         | -0.538                   |
| SWE (kg/m2)           |             |               |        |            |            |        | 0.149         | -0.538                   |
| Precipitation (mm)    |             |               |        |            |            |        |               | -0.032                   |

Table S12. Pueblo de Taos sub basins, correlation coefficient among all the variables

| Variables             | Sublimation | Soil Moisture | Albedo | Snow Cover | Snow Depth | SWE    | Precipitation | Avg. Temperature (deg C) |
|-----------------------|-------------|---------------|--------|------------|------------|--------|---------------|--------------------------|
| Streamflow (ac-ft.)   | 0.105       | 0.034         | -0.203 | -0.201     | -0.125     | -0.125 | 0.027         | 0.211                    |
| Sublimation (J/kg)    |             | -0.329        | -0.379 | -0.380     | -0.324     | -0.325 | -0.115        | 0.354                    |
| Soil Moisture (kg/m3) |             |               | 0.468  | 0.483      | 0.505      | 0.505  | 0.243         | -0.493                   |
| Snow Albedo (%)       |             |               |        | 0.998      | 0.948      | 0.948  | 0.036         | -0.669                   |
| Snow Cover            |             |               |        |            | 0.951      | 0.951  | 0.041         | -0.672                   |
| Snow Depth (m)        |             |               |        |            |            | 1.000  | 0.061         | -0.542                   |
| SWE (kg/m2)           |             |               |        |            |            |        | 0.062         | -0.542                   |
| Precipitation (mm)    |             |               |        |            |            |        |               | 0.129                    |

Table S13. Red River bl sub basins, correlation coefficient among all the variables

| Variables             | Sublimation | Soil Moisture | Albedo | Snow Cover | Snow Depth | SWE    | Precipitation | Avg. Temperature (deg C) |
|-----------------------|-------------|---------------|--------|------------|------------|--------|---------------|--------------------------|
| Streamflow (ac-ft.)   | 0.118       | -0.061        | -0.287 | -0.288     | -0.219     | -0.219 | 0.033         | 0.370                    |
| Sublimation (J/kg)    |             | -0.230        | -0.330 | -0.331     | -0.314     | -0.315 | -0.104        | 0.296                    |
| Soil Moisture (kg/m3) |             |               | 0.487  | 0.496      | 0.550      | 0.550  | 0.271         | -0.466                   |
| Snow Albedo (%)       |             |               |        | 0.997      | 0.945      | 0.944  | 0.019         | -0.725                   |
| Snow Cover            |             |               |        |            | 0.951      | 0.951  | 0.027         | -0.716                   |
| Snow Depth (m)        |             |               |        |            |            | 1.000  | 0.064         | -0.586                   |
| SWE (kg/m2)           |             |               |        |            |            |        | 0.064         | -0.586                   |
| Precipitation (mm)    |             |               |        |            |            |        |               | 0.162                    |

Table S14. Saguache sub basins, correlation coefficient among all the variables

| Variables             | Sublimation | Soil Moisture | Albedo | Snow Cover | Snow Depth | SWE    | Precipitation | Avg. Temperature (deg C) |
|-----------------------|-------------|---------------|--------|------------|------------|--------|---------------|--------------------------|
| Streamflow (ac-ft.)   | 0.150       | 0.118         | -0.331 | -0.332     | -0.164     | -0.164 | 0.055         | 0.440                    |
| Sublimation (J/kg)    |             | -0.372        | -0.509 | -0.510     | -0.518     | -0.518 | -0.139        | 0.343                    |
| Soil Moisture (kg/m3) |             |               | 0.463  | 0.473      | 0.528      | 0.528  | 0.181         | -0.349                   |
| Snow Albedo (%)       |             |               |        | 0.998      | 0.866      | 0.866  | 0.000         | -0.810                   |
| Snow Cover            |             |               |        |            | 0.865      | 0.865  | 0.005         | -0.802                   |
| Snow Depth (m)        |             |               |        |            |            | 1.000  | 0.071         | -0.542                   |
| SWE (kg/m2)           |             |               |        |            |            |        | 0.071         | -0.542                   |
| Precipitation (mm)    |             |               |        |            |            |        |               | 0.153                    |

Table S15. San Antonio sub basins, correlation coefficient among all the variables

| Variables             | Sublimation | Soil Moisture | Albedo | Snow Cover | Snow Depth | SWE    | Precipitation | Avg. Temperature (deg C) |
|-----------------------|-------------|---------------|--------|------------|------------|--------|---------------|--------------------------|
| Streamflow (ac-ft.)   | -0.044      | 0.416         | 0.023  | 0.027      | 0.124      | 0.124  | -0.040        | 0.012                    |
| Sublimation (J/kg)    |             | -0.381        | -0.389 | -0.381     | -0.431     | -0.432 | -0.307        | 0.300                    |
| Soil Moisture (kg/m3) |             |               | 0.684  | 0.687      | 0.685      | 0.685  | 0.308         | -0.532                   |
| Snow Albedo (%)       |             |               |        | 0.999      | 0.858      | 0.858  | 0.339         | -0.803                   |
| Snow Cover            |             |               |        |            | 0.854      | 0.854  | 0.339         | -0.795                   |
| Snow Depth (m)        |             |               |        |            |            | 1.000  | 0.306         | -0.528                   |
| SWE (kg/m2)           |             |               |        |            |            |        | 0.306         | -0.528                   |
| Precipitation (mm)    |             |               |        |            |            |        |               | -0.244                   |

Table S16. Santa Cruz sub basins, correlation coefficient among all the variables

| Variables             | Sublimation | Soil Moisture | Albedo | Snow Cover | Snow Depth | SWE    | Precipitation | Avg. Temperature (deg C) |
|-----------------------|-------------|---------------|--------|------------|------------|--------|---------------|--------------------------|
| Streamflow (ac-ft.)   | 0.103       | -0.001        | -0.212 | -0.210     | -0.101     | -0.101 | 0.055         | 0.298                    |
| Sublimation (J/kg)    |             | -0.285        | -0.265 | -0.254     | -0.285     | -0.286 | -0.126        | 0.296                    |
| Soil Moisture (kg/m3) |             |               | 0.588  | 0.582      | 0.686      | 0.686  | 0.250         | -0.484                   |
| Snow Albedo (%)       |             |               |        | 0.998      | 0.867      | 0.867  | 0.071         | -0.662                   |
| Snow Cover            |             |               |        |            | 0.868      | 0.868  | 0.078         | -0.649                   |
| Snow Depth (m)        |             |               |        |            |            | 1.000  | 0.092         | -0.494                   |
| SWE (kg/m2)           |             |               |        |            |            |        | 0.092         | -0.494                   |
| Precipitation (mm)    |             |               |        |            |            |        |               | 0.151                    |

Table S17. Santa Fe River sub basins, correlation coefficient among all the variables

| Variables             | Sublimation | Soil Moisture | Albedo | Snow Cover | Snow Depth | SWE    | Precipitation | Avg. Temperature (deg C) |
|-----------------------|-------------|---------------|--------|------------|------------|--------|---------------|--------------------------|
| Streamflow (ac-ft.)   | 0.087       | 0.065         | -0.177 | -0.174     | -0.139     | -0.139 | 0.118         | 0.181                    |
| Sublimation (J/kg)    |             | -0.411        | -0.422 | -0.428     | -0.383     | -0.384 | -0.080        | 0.328                    |
| Soil Moisture (kg/m3) |             |               | 0.551  | 0.556      | 0.583      | 0.584  | 0.298         | -0.437                   |
| Snow Albedo (%)       |             |               |        | 0.993      | 0.961      | 0.961  | 0.084         | -0.595                   |
| Snow Cover            |             |               |        |            | 0.971      | 0.971  | 0.094         | -0.582                   |
| Snow Depth (m)        |             |               |        |            |            | 1.000  | 0.096         | -0.523                   |
| SWE (kg/m2)           |             |               |        |            |            |        | 0.096         | -0.523                   |
| Precipitation (mm)    |             |               |        |            |            |        |               | 0.220                    |

Table S18. Trinchera sub basins, correlation coefficient among all the variables

| Variables             | Sublimation | Soil Moisture | Albedo | Snow Cover | Snow Depth | SWE    | Precipitation | Avg. Temperature (deg C) |
|-----------------------|-------------|---------------|--------|------------|------------|--------|---------------|--------------------------|
| Streamflow (ac-ft.)   | 0.111       | 0.088         | -0.304 | -0.308     | -0.208     | -0.208 | -0.074        | 0.376                    |
| Sublimation (J/kg)    |             | -0.232        | -0.308 | -0.306     | -0.264     | -0.265 | -0.198        | 0.293                    |
| Soil Moisture (kg/m3) |             |               | 0.438  | 0.440      | 0.471      | 0.471  | 0.365         | -0.332                   |
| Snow Albedo (%)       |             |               |        | 0.999      | 0.892      | 0.892  | 0.142         | -0.781                   |
| Snow Cover            |             |               |        |            | 0.891      | 0.891  | 0.143         | -0.781                   |
| Snow Depth (m)        |             |               |        |            |            | 1.000  | 0.154         | -0.551                   |
| SWE (kg/m2)           |             |               |        |            |            |        | 0.154         | -0.551                   |
| Precipitation (mm)    |             |               |        |            |            |        |               | -0.090                   |

Table S19. Ute Creek sub basins, correlation coefficient among all the variables

| Variables             | Sublimation | Soil Moisture | Albedo | Snow Cover | Snow Depth | SWE    | Precipitation | Avg. Temperature (deg C) |
|-----------------------|-------------|---------------|--------|------------|------------|--------|---------------|--------------------------|
| Streamflow (ac-ft.)   | 0.147       | 0.164         | -0.353 | -0.349     | -0.231     | -0.231 | 0.036         | 0.446                    |
| Sublimation (J/kg)    |             | -0.193        | -0.335 | -0.328     | -0.280     | -0.280 | -0.127        | 0.319                    |
| Soil Moisture (kg/m3) |             |               | 0.259  | 0.273      | 0.355      | 0.355  | 0.380         | -0.206                   |
| Snow Albedo (%)       |             |               |        | 0.998      | 0.880      | 0.880  | 0.044         | -0.770                   |
| Snow Cover            |             |               |        |            | 0.880      | 0.879  | 0.050         | -0.763                   |
| Snow Depth (m)        |             |               |        |            |            | 1.000  | 0.082         | -0.532                   |
| SWE (kg/m2)           |             |               |        |            |            |        | 0.083         | -0.532                   |
| Precipitation (mm)    |             |               |        |            |            |        |               | 0.038                    |
